# Supplementary material for: Carbon Isotope Fractionation during the Formation of CO2 Hydrate and Equilibrium Pressures of 12CO2 and 13CO2 Hydrates
Source: MDPI journal article supplement (doi:10.3390/molecules26144215), 2021-07-11

# Carbon Isotope Fractionation during the Formation of CO<sub>2</sub> Hydrate and Equilibrium Pressures of <sup>12</sup>CO<sub>2</sub> and <sup>13</sup>CO<sub>2</sub> Hydrates

Hiroimi Kimura <sup>1</sup>, Go Fuseya <sup>1</sup>, Satoshi Takeya <sup>2</sup> and Akihiro Hachikubo <sup>3,\*</sup>

<sup>1</sup> Graduate School of Engineering, Kitami Institute of Technology, 165 Koen-cho, Kitami 090-8507, Japan; mayu011970@gmail.com (H.K.); fuseya1992@gmail.com (G.F.)

<sup>2</sup> National Metrology Institute of Japan (NMIJ), National Institute of Advanced Industrial Science and Technology (AIST), Central 5, Higashi 1-1-1, Tsukuba 305-8565, Japan; s.takeya@aist.go.jp

<sup>3</sup> Environmental and Energy Resources Research Center, Kitami Institute of Technology, 165 Koen-cho, Kitami 090-8507, Japan

\* Correspondence: hachi@mail.kitami-it.ac.jp

**\*Figure S1.** Powder X-ray diffraction patterns of the mixture of sI hydrate enclathrated CO<sub>2</sub> isotopologues and hexagonal ice Ih. (a) <sup>12</sup>CO<sub>2</sub> hydrate; (b) <sup>13</sup>CO<sub>2</sub> hydrate.

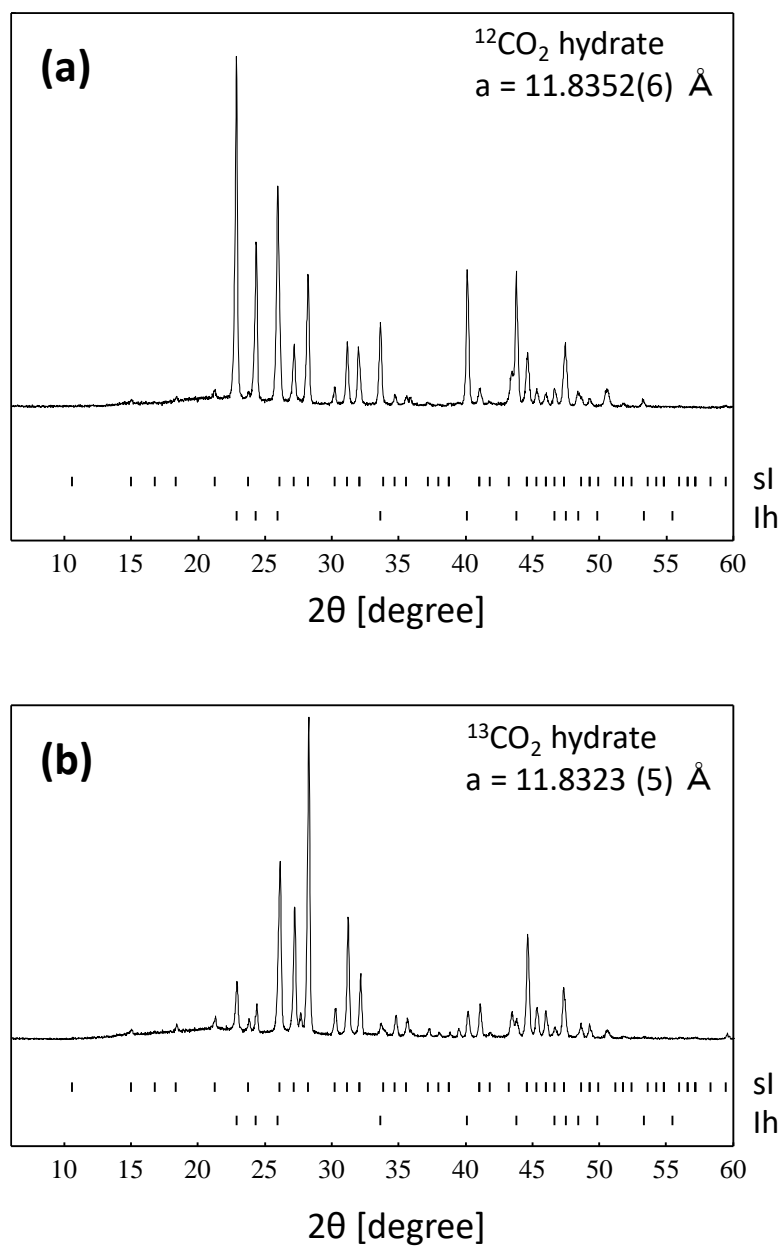

Supplement: s1 [file s1]
